# Supplementary material
Source: PubMed Central journal article supplement (PMC5766908)
Supplement: 10.1074_M117.814541_jbc.M117.814541-1.pdf [file 10.1074_M117.814541_jbc.M117.814541-1.pdf]

## **Structure and function of three human antibodies targeting the vaccinia virus adhesion molecule D8**

Michael H. Matho, Andrew Schlossman, Iuliia M. Gilchuk, Greg Miller, Zbigniew Mikulski, Matthias Hupfer, Jing Wang, Xiangzhi Meng, Yan Xiang, Tom Kaever, Tzanko Doukov, Klaus Ley, Shane Crotty, Bjoern Peters, Linda C. Hsieh-Wilson, James E. Crowe, Jr., and Dirk M. Zajonc

**Table S1**

**Table S1**

**Figure S1**

**Figure S2**

**TABLE S1.** D8 epitope residues and buried surface area.

| Antibody        | Chain | H-bond, salt bridge <sup>s</sup>                                                                  | VdW                                                                                | BSA (Å <sup>2</sup> ) |
|-----------------|-------|---------------------------------------------------------------------------------------------------|------------------------------------------------------------------------------------|-----------------------|
| <b>VACV-66</b>  | HC    | Q3, Q4, H110, D111 <sup>s</sup> , D112, D179, D228 <sup>s</sup> , T229                            | N18, R20, L21, F56, P58, Y61, K109, H110, D112, I115, T168, L170, V181, E230, Y232 | 1776                  |
|                 | LC    | R20                                                                                               | N18, A19                                                                           | 306                   |
| <b>VACV-138</b> | HC    | T34, T35, Q37, R44 <sup>s</sup> , N46, K48, S65, Y104, E105, K108 <sup>s</sup> , N145, S147, N175 | T39, S64, T146, P149                                                               | 1432                  |
|                 | LC    | N145                                                                                              | R142, S143, A144, L203                                                             | 564                   |
| <b>VACV-304</b> | HC    | T34, T35, N46, E105, S140, N145, S147                                                             | Q37, N38, T39, N46, F47, T146, A148, P149                                          | 1010                  |
|                 | LC    | K48 <sup>s</sup> , K98, S102, Y104                                                                | T34, F47, W96, S103, P149, D151                                                    | 977                   |

**TABLE S2.** Antibody-antigen polar contacts

| Antibody and H or L chain | D8 Antigen            | CDR | Interaction <sup>a</sup> |
|---------------------------|-----------------------|-----|--------------------------|
| <b>VACV-66</b>            |                       |     |                          |
| Ser30H <sup>O</sup>       | Gln3 <sup>NE2</sup>   | H1  | H                        |
| Asn32H <sup>OD1</sup>     | Gln4 <sup>N</sup>     | H1  | H                        |
| Asn32H <sup>ND2</sup>     | Gln4 <sup>O</sup>     | H1  | H                        |
| Asn32H <sup>ND2</sup>     | Gln3 <sup>OE1</sup>   | H1  | H                        |
| Asn32H <sup>ND2</sup>     | Asp179 <sup>OD1</sup> | H1  | H                        |
| Asn33H <sup>ND2</sup>     | Thr229 <sup>OG1</sup> | H1  | H                        |
| Tyr34H <sup>OH</sup>      | Asp228 <sup>OD2</sup> | H1  | H                        |
| Tyr35H <sup>OH</sup>      | Asp111 <sup>OD2</sup> | H1  | H                        |
| Tyr55H <sup>OH</sup>      | Gln3 <sup>OE1</sup>   | H2  | H                        |
| Tyr55H <sup>OH</sup>      | Asp179 <sup>OD2</sup> | H2  | H                        |
| Ser58H <sup>OG</sup>      | Asp111 <sup>N</sup>   | H2  | H                        |
| Ser58H <sup>OG</sup>      | His110 <sup>ND1</sup> | H2  | H                        |
| Tyr60H <sup>OH</sup>      | Asp111 <sup>OD1</sup> | H2  | H                        |
| Tyr60H <sup>OH</sup>      | Asp111 <sup>OD2</sup> | H2  | H                        |
| Tyr60H <sup>OH</sup>      | Asp112 <sup>OD1</sup> | H2  | H                        |
| Tyr60H <sup>OH</sup>      | Asp112 <sup>OD2</sup> | H2  | H                        |
| Tyr60H <sup>OH</sup>      | Lys100 <sup>NZ</sup>  | H2  | H                        |
| Arg101 <sup>NH1</sup>     | Asp228 <sup>O</sup>   | H3  | H                        |

|                        |                       |    |   |
|------------------------|-----------------------|----|---|
| Arg101 <sup>NH2</sup>  | Asp228 <sup>O</sup>   | H3 | H |
| Arg102 <sup>NH1</sup>  | Asp111H <sup>O</sup>  | H3 | H |
| Arg102 <sup>NH2</sup>  | Asp111H <sup>O</sup>  | H3 | H |
| <b>VACV-138</b>        |                       |    |   |
| Thr28H <sup>OG1</sup>  | Lys48 <sup>Nz</sup>   | H1 | H |
| Asp31H <sup>OD2</sup>  | Thr34 <sup>OG1</sup>  | H1 | H |
| Asp31H <sup>OD2</sup>  | Lys48 <sup>Nz</sup>   | H1 | S |
| Asp31H <sup>O</sup>    | Gln37 <sup>NE2</sup>  | H1 | H |
| Asp31H <sup>O</sup>    | Thr35 <sup>OG1</sup>  | H1 | H |
| Asp52H <sup>OD2</sup>  | Arg44 <sup>NH1</sup>  | H2 | S |
| Asp52H <sup>OD1</sup>  | Arg44 <sup>NH2</sup>  | H2 | S |
| Gln54H <sup>OE1</sup>  | Ser65 <sup>OG</sup>   | H2 | H |
| Gln54H <sup>NE2</sup>  | Asn46 <sup>OD1</sup>  | H2 | H |
| Glu55H <sup>OE1</sup>  | Lys108 <sup>NZ</sup>  | H2 | S |
| Glu55H <sup>OE2</sup>  | Arg44 <sup>NH1</sup>  | H2 | S |
| Glu55H <sup>OE2</sup>  | Tyr104 <sup>OH</sup>  | H2 | H |
| Glu55H <sup>O</sup>    | Lys108 <sup>NZ</sup>  | H2 | H |
| Glu57 <sup>OE1</sup>   | Asn175 <sup>ND2</sup> | H2 | H |
| Thr74H <sup>OG1</sup>  | Glu105 <sup>OE2</sup> | FR | H |
| Glu99H <sup>OE1</sup>  | Ser147 <sup>OG</sup>  | H3 | H |
| Glu99H <sup>OE2</sup>  | Ser147 <sup>N</sup>   | H3 | H |
| Tyr98L <sup>OH</sup>   | Asn145 <sup>ND2</sup> | L3 | H |
| <b>VACV-304</b>        |                       |    |   |
| Asn31H <sup>OD1</sup>  | Asn145 <sup>ND2</sup> | H1 | H |
| Trp33H <sup>NE1</sup>  | Ser147 <sup>O</sup>   | H1 | H |
| Lys52H <sup>NZ</sup>   | Ser140 <sup>OG</sup>  | H2 | H |
| Gln53H <sup>NE2</sup>  | Ser147 <sup>OG</sup>  | H2 | H |
| Gln53H <sup>OE1</sup>  | Ser147 <sup>N</sup>   | H2 | H |
| Glu102H <sup>O</sup>   | Asn46 <sup>ND2</sup>  | H3 | H |
| Glu102H <sup>O</sup>   | Thr35 <sup>OG1</sup>  | H3 | H |
| Glu102H <sup>OE1</sup> | Thr34 <sup>OG1</sup>  | H3 | H |
| Ala104H <sup>N</sup>   | Ser147 <sup>OG</sup>  | H3 | H |
| Ser109H <sup>N</sup>   | Glu105 <sup>OE2</sup> | H3 | H |
| Leu27L <sup>O</sup>    | Lys48 <sup>NZ</sup>   | L1 | H |
| Gln30L <sup>O</sup>    | Lys48 <sup>NZ</sup>   | L1 | H |
| Asp50L <sup>OD1</sup>  | Lys48 <sup>NZ</sup>   | L2 | S |
| Asp50L <sup>OD2</sup>  | Lys48 <sup>NZ</sup>   | L2 | S |
| Ser51L <sup>OG</sup>   | Lys98 <sup>NZ</sup>   | L2 | H |
| Glu52L <sup>OE1</sup>  | Tyr104 <sup>N</sup>   | L2 | H |
| Arg53L <sup>N</sup>    | Ser102 <sup>O</sup>   | L2 | H |

<sup>a</sup>Hydrogen bond (H), salt-bridge (S)

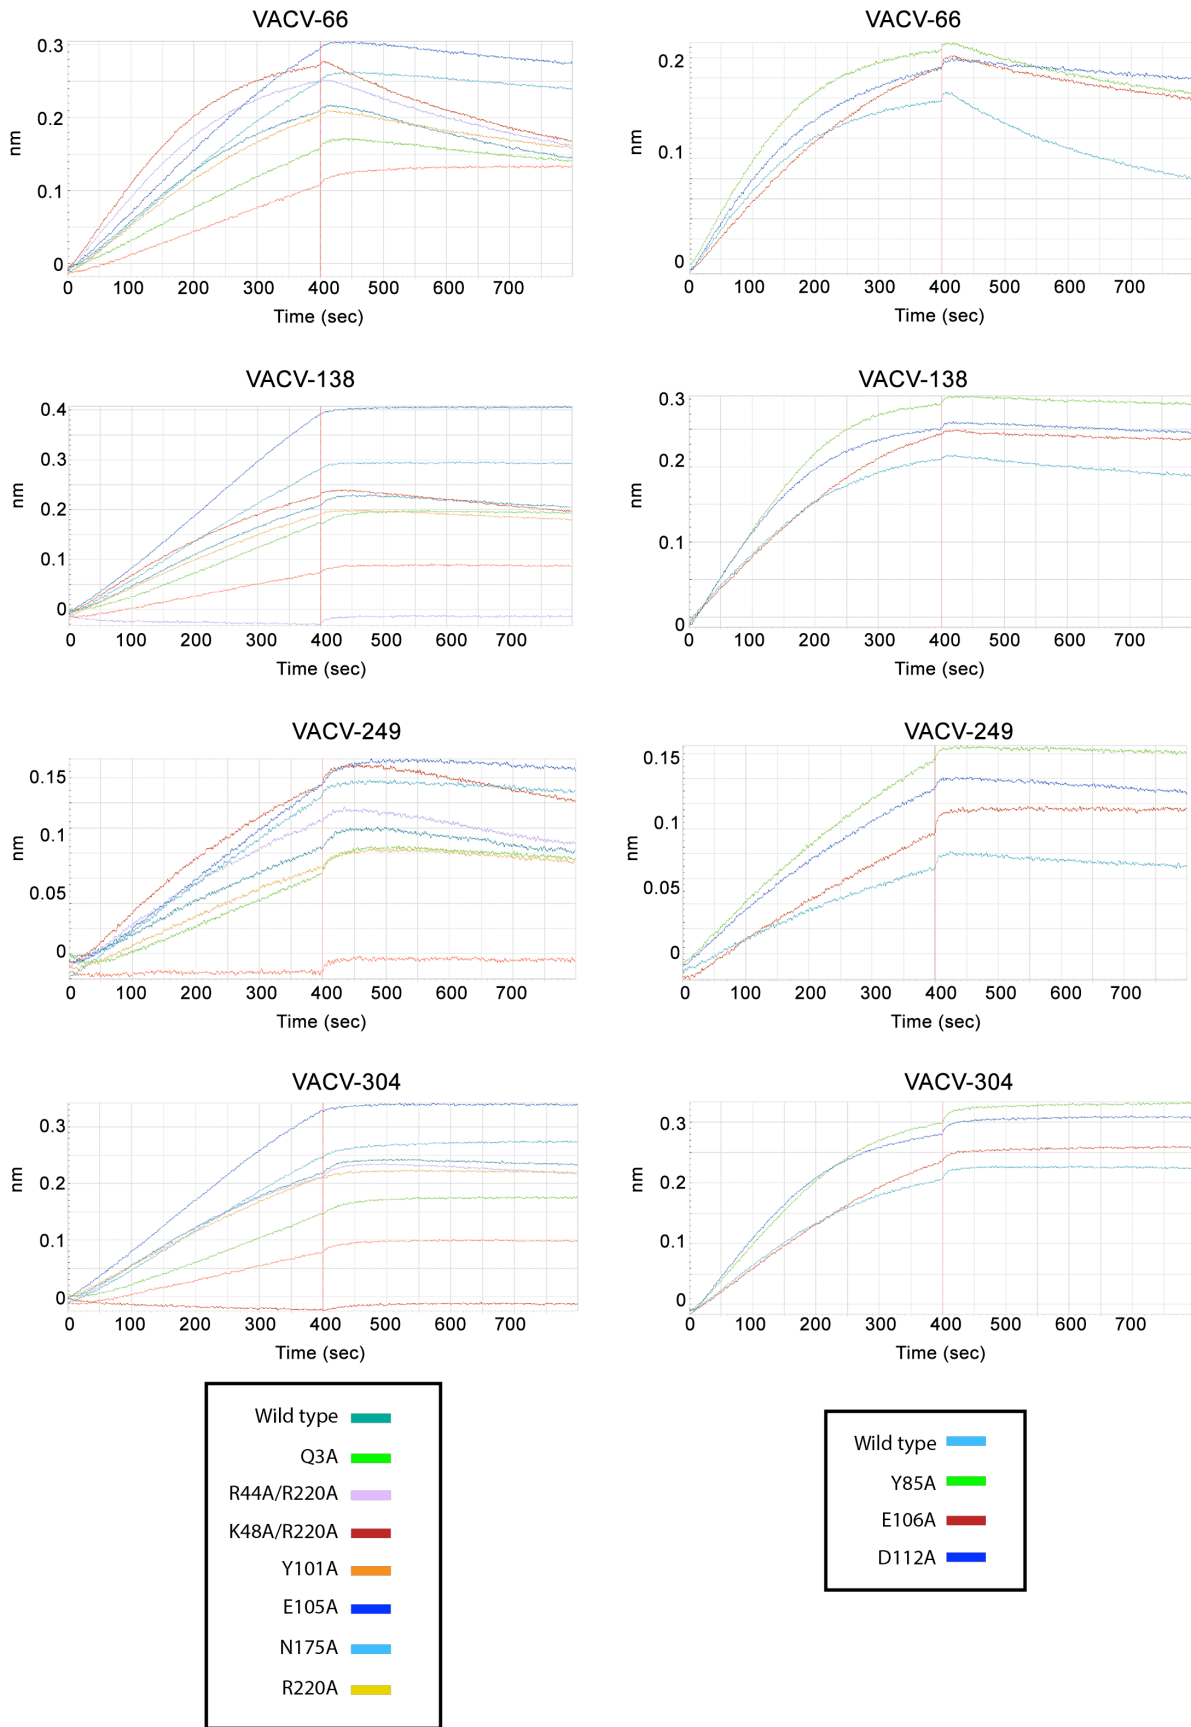

**Figure S1.** Antibody binding to D8 mutants. BLI experiment using a single dose of indicated MAb to various immobilized D8 mutants.

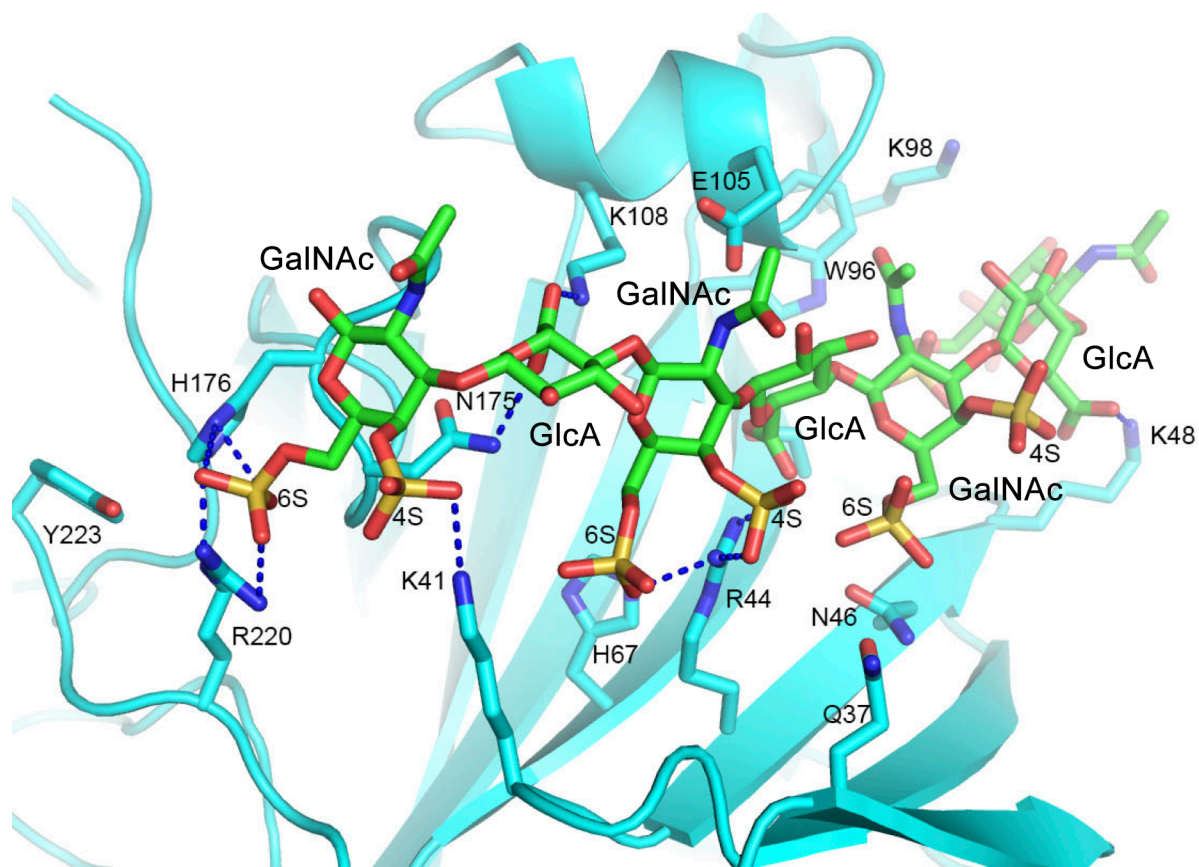

**Figure S2.** D8-CS-E model. Computational model of CS-E (green sticks) binding along the central crevice of D8 (in cyan), with individual D8 residues indicated. Predicted polar interactions shown as blue dotted lines. GalNAc, N-acetyl galactosamine; GlcA, glucuronic acid.
